# Supplementary material
Source: ML conference proceedings conference paper supplement (https://www.ecva.net/papers/eccv_2022/papers_ECCV/html/136800229_ECCV_2022_paper.php)
Supplement: Supplementary file 1 [file 136800229-supp.pdf]

# DnA: Improve Few-Shot Transfer Learning with Low-Rank Decompose and Align

Ziyu Jiang<sup>1,2†</sup>, Tianlong Chen<sup>3</sup>, Xuxi Chen<sup>3</sup>, Yu Cheng<sup>1</sup>, Luwei Zhou<sup>1</sup>,  
Lu Yuan<sup>1</sup>, Ahmed Awadallah<sup>1</sup>, and Zhangyang Wang<sup>3‡</sup>

<sup>1</sup> Microsoft Corporation

<sup>2</sup> Texas A&M University

<sup>3</sup> University of Texas at Austin

This supplementary material contains the following details that we could not include in the main paper due to space restrictions.

- (Sec. 1) Details of the computing infrastructure.
- (Sec. 2) Comparison with LoRA [1].

## 1 Details of computing infrastructure

Our codes are based on Pytorch [2], and all models are trained with NVIDIA A100 Tensor Core GPU.

## 2 Comparison with LoRA [1]

LoRA, a closely related work, shows that formalizing the weight changing as a low-rank matrix can also improve the fine-tuning performance. Therefore, we compare with Align+LoRA to verify the effectiveness of the proposed Decomposition method. As illustrated at Table 1, by applying the LoRA with Align, the performance could improve by 0.4%. However, it is still weaker than the proposed DnA with an obvious margin of 0.5%.

Table 1: Compare with LoRA [1] in terms of the 5-shot performance on iNaturalist-1k.

| Method     | Accuracy |
|------------|----------|
| Align      | 47.4     |
| Align+LoRA | 47.8     |
| DnA (Ours) | 48.3     |

---

<sup>†</sup> Work done during an internship at Microsoft Corporation

<sup>‡</sup> Correspondence to: Zhangyang Wang (atlaswang@utexas.edu)

## References

1. Hu, E.J., Shen, Y., Wallis, P., Allen-Zhu, Z., Li, Y., Wang, S., Wang, L., Chen, W.: Lora: Low-rank adaptation of large language models. arXiv preprint arXiv:2106.09685 (2021)
2. Paszke, A., Gross, S., Chintala, S., Chanan, G., Yang, E., DeVito, Z., Lin, Z., Desmaison, A., Antiga, L., Lerer, A.: Automatic differentiation in pytorch (2017)
